# Supplementary material for: Lysosomal-targeted fluorescent probe based pH regulating reactivity for tracking cysteine dynamics under oxidative stress
Source: Royal Society of Chemistry journal article supplement (doi:10.1039/d4tb00478g), 2024-01-01
Supplement: d4tb00478g1.pdf [file d4tb00478g1.pdf]

*Electronic Supporting Information*

**Lysosomal-targeted fluorescent probe based pH regulating reactivity  
for tracking of Cysteine dynamics in oxidative stress**

Tao Liu<sup>a,#</sup>, Xuwei Han<sup>a,c,#</sup>, Wenjing Zhao<sup>a</sup>, Ke Gao<sup>a,c</sup>, Runan Min<sup>a,c</sup>, Yuting Tian<sup>a,c</sup>, Xueyi Sun<sup>a</sup> and

Caixia Yin<sup>b,\*</sup>

<sup>a</sup> *Department of Chemical and Materials Engineering, Lvliang University, Lvliang 033001, P. R. China*

<sup>b</sup> *Key Laboratory of Chemical Biology and Molecular Engineering of Ministry of Education, Institute of Molecular Science, Shanxi University, Taiyuan 030006, P. R. China.*

<sup>c</sup> *School of Chemistry and Chemical Engineering, Shanxi University, Taiyuan 030006, P. R. China*

*Corresponding author. E-mail address: [yincx@sxu.edu.cn](mailto:yincx@sxu.edu.cn) (C. Yin)*

[#] *These authors contributed equally to this work.*

## 1. Experimental Section

**Materials.** The chemicals used in the experiments were purchased from Shanghai Aladdin Biochemical Technology Co, Ltd. and did not require further purification for use. Roswell Park Memorial Institute 1640 (RPMI 1640) was purchased from Beijing Solarbio Science&Technoiogy Co., Ltd. The distilled water used was processed by a water ultrapure purification system, and the PBS buffer solution was made from commercially available PBS phosphate buffer dry powder (2 L/bag) dissolved in distilled water and fixed to 2 L. All sample solutions were prepared from solid samples dissolved in DMSO or water.

**Instruments.** Hitachi U-3900 UV-Vis spectrophotometer was employed to measure UV-Vis spectra. Hitachi F-7000 fluorescence spectrophotometer was employed to measure fluorescence spectra.  $^1\text{H}$  and  $^{13}\text{C}$  NMR experiments were performed with a Bruker Avance III HD 600 and 151 MHz NMR spectrometer, respectively (Bruker, Billerica, MA). Coupling constants ( $J$  values) are reported in hertz. ESI determinations were carried out on AB Triple TOF 5600plus System (AB SCIEX, Framingham, U.S.A.). The cell imaging experiments were measured by a Zeiss LSM880 confocal laser scanning microscope.

**Colocalization.** Hela cells were cultured overnight on 35 mm glass-bottom culture dishes and washed with PBS (3 times  $\times$  2 mL). After incubation with 10  $\mu\text{M}$  ECMA for 10 min, the cells were washed with PBS three times. Then, Lyso-Tracker Red (LTR) was added and co-incubated for another 30 min at 37  $^\circ\text{C}$ . And then washed with PBS (10 mM, pH 7.4) for three times. Fluorescence images were acquired on a fluorescence confocal microscope with an orange channel for ECMA and a red channel for Lyso-Tracker Red, respectively.

**Experimental process of real-time fluorescence imaging of cells:** Hela cells were first pretreated with ECMA for 10 min, the excess ECMA was then washed out by PBS (3 times  $\times$  2 mL). The pretreated Hela cells were subsequently co-incubated with Cys or  $\text{H}_2\text{O}_2$ , respectively. Finally, real-time imaging experiments were carried out on a confocal microscope (10 min). (Orange channel:  $\lambda_{\text{em}} = 542\text{-}602$  nm,  $\lambda_{\text{ex}} = 488$  nm; Blue channel:  $\lambda_{\text{em}} = 460\text{-}520$  nm,  $\lambda_{\text{ex}} = 405$  nm)

## 2. Synthesis and Characterization

**Synthesis of compound 1.**  $\text{POCl}_3$  (0.6 mL) was slowly added to a round bottom flask containing 0.8 mL *N,N*-Dimethylformamide (DMF). The reaction mixture was stirred at 0  $^\circ\text{C}$  for 2 h. Then, 7-(diethylamino)coumarin (480 mg, 2.2 mmol) dissolved in 4 mL DMF was added dropwise to the mixed solution of the above followed by stirring at 60  $^\circ\text{C}$  for 12 h. Subsequently, the reaction solution was poured into 200 mL of ice water, the pH was adjusted to 5-6, and the precipitate was filtered and washed with water three times.  $^1\text{H}$  NMR (600 MHz,  $\text{DMSO-}d_6$ )  $\delta$  9.89 (s, 1H), 8.39 (s, 1H), 7.66 (d,  $J = 9.0$  Hz, 1H), 6.81 (dd,  $J = 9.1, 2.5$  Hz, 1H), 6.59 (d,  $J = 2.4$  Hz, 1H), 3.50 (q,  $J = 7.1$  Hz, 4H), 1.15 (t,  $J = 7.0$  Hz, 6H);  $^{13}\text{C}$  NMR (151 MHz,  $\text{DMSO-}d_6$ )  $\delta$  187.57, 161.18, 158.92, 153.91, 146.58, 133.53, 113.64, 110.94, 108.15, 96.85, 45.02, 12.83. HR-MS: [**Compound 1** + H] $^+$  calculated for  $\text{C}_{14}\text{H}_{16}\text{NO}_3^+$  246.1125, found 246.1127.

**Synthesis of probe ECMA.** Compound 1 (490 mg, 2 mmol) and 3-morpholino-3-oxopropanenitrile (460 mg, 3 mmol) with piperidine (30  $\mu\text{L}$ ) was dissolved in anhydrous ethanol (20 mL). The mixture was

heated at 80 °C for 5 h. Then, the solvent was evaporated and the crude solid was purified by silica gel column chromatography (CH<sub>2</sub>Cl<sub>2</sub>/CH<sub>3</sub>OH, v/v = 50/1) on silica gel to obtain the desired product (320 mg, yield 41.9%) as an orange-red powder. <sup>1</sup>H NMR (600 MHz, DMSO-*d*<sub>6</sub>) δ 8.65 (s, 1H), 7.97 (s, 1H), 7.68 (s, 1H), 7.59 (d, *J* = 9.0 Hz, 1H), 7.56 (d, *J* = 9.0 Hz, 1H), 7.44 (s, 1H), 6.82 (dd, *J* = 9.1, 2.5 Hz, 1H), 6.79 (dd, *J* = 9.0, 2.5 Hz, 1H), 6.64 (d, *J* = 2.6 Hz, 1H), 6.59 (d, *J* = 2.4 Hz, 1H), 3.64 – 3.59 (m, 12H), 3.53 – 3.49 (m, 12H), 1.16 – 1.13 (m, 12H). <sup>13</sup>C NMR (151 MHz, DMSO): δ 162.99, 161.59, 160.55, 159.50, 157.56, 157.33, 153.22, 153.00, 145.77, 144.67, 143.56, 142.60, 132.10, 131.86, 118.14, 116.93, 111.74, 111.07, 110.83, 110.64, 108.12, 108.08, 105.50, 103.16, 97.02, 96.76, 66.36, 66.05, 47.19, 44.95, 42.31, 12.83. HR-MS: [M + H]<sup>+</sup> Calcd for C<sub>21</sub>H<sub>24</sub>N<sub>3</sub>O<sub>4</sub><sup>+</sup> 382.1761, found 382.1756.

### Synthesis route

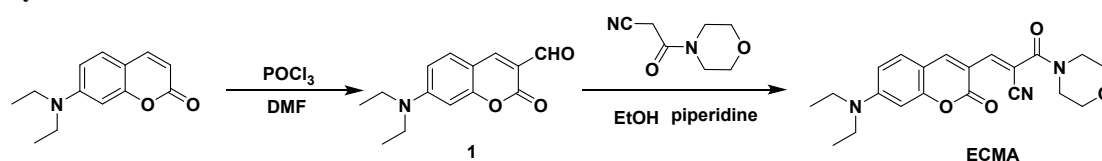

**Figure S1.** Synthesis route of ECMA

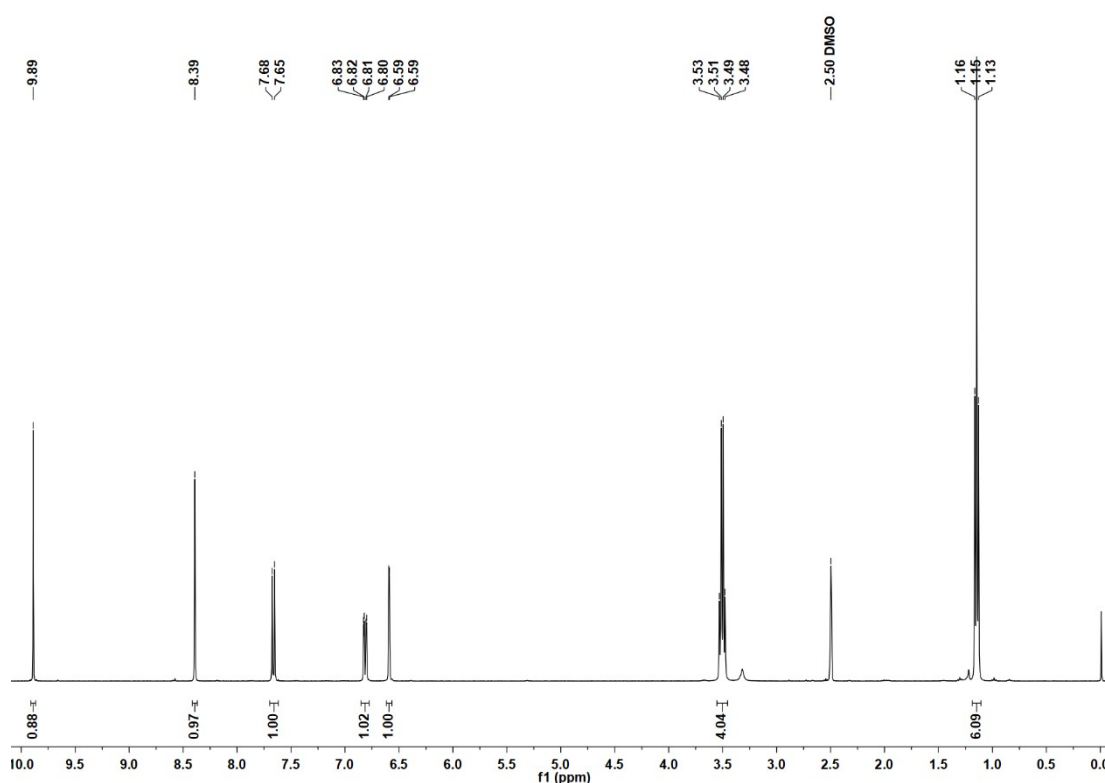

**Figure S2.** The <sup>1</sup>H NMR (600 MHz) spectra of Compound 1 in DMSO.

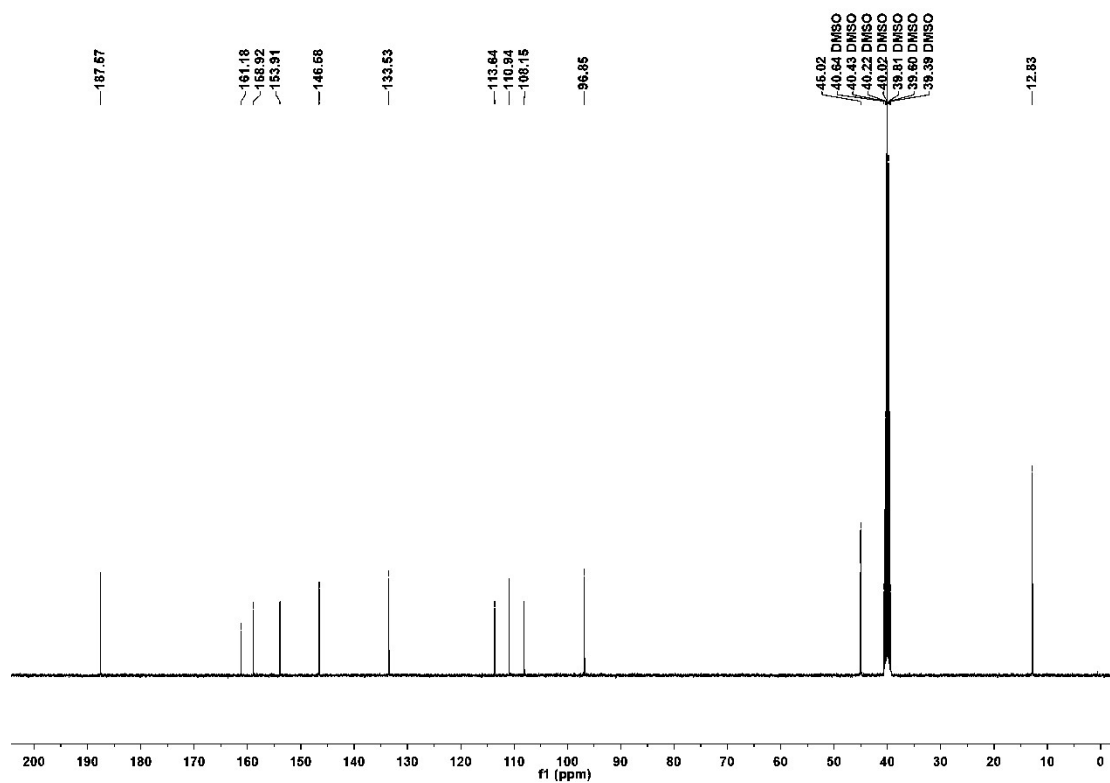

**Figure S3.** The  $^{13}\text{C}$  NMR (151 MHz) spectra of Compound **1** in DMSO.

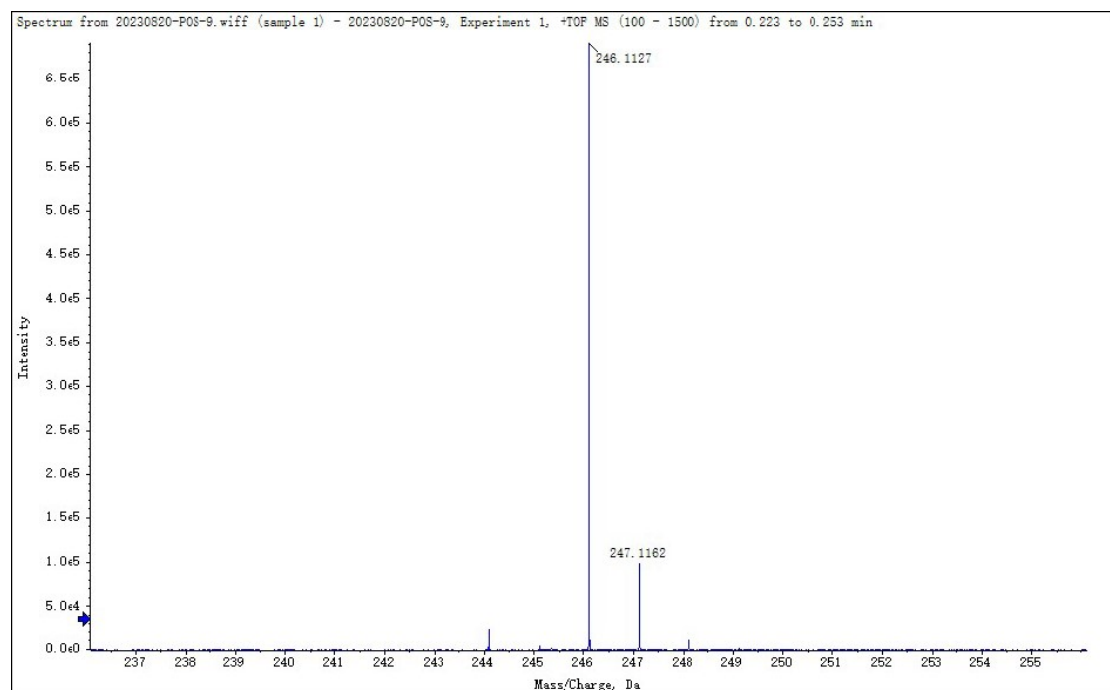

**Figure S4.** HR-MS spectra of Compound **1**

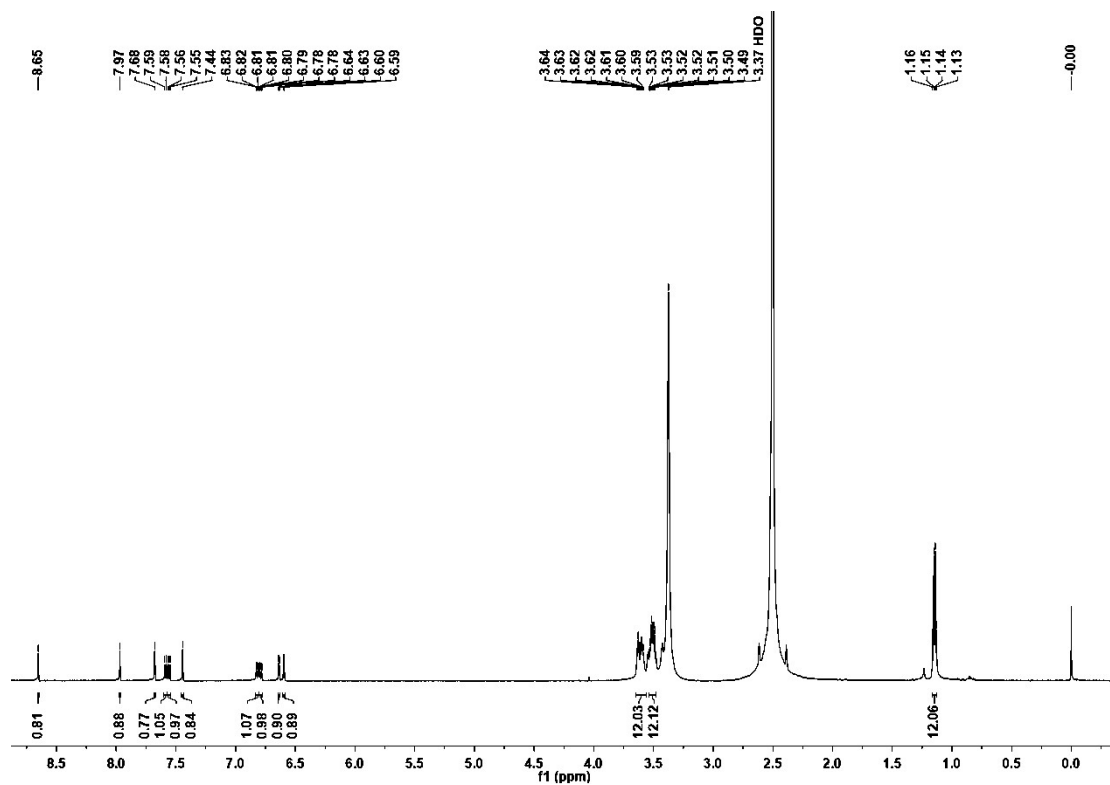

Figure S5. The  $^1\text{H}$  NMR (600 MHz) spectra of Compound ECMA in  $\text{DMSO-}d_6$ .

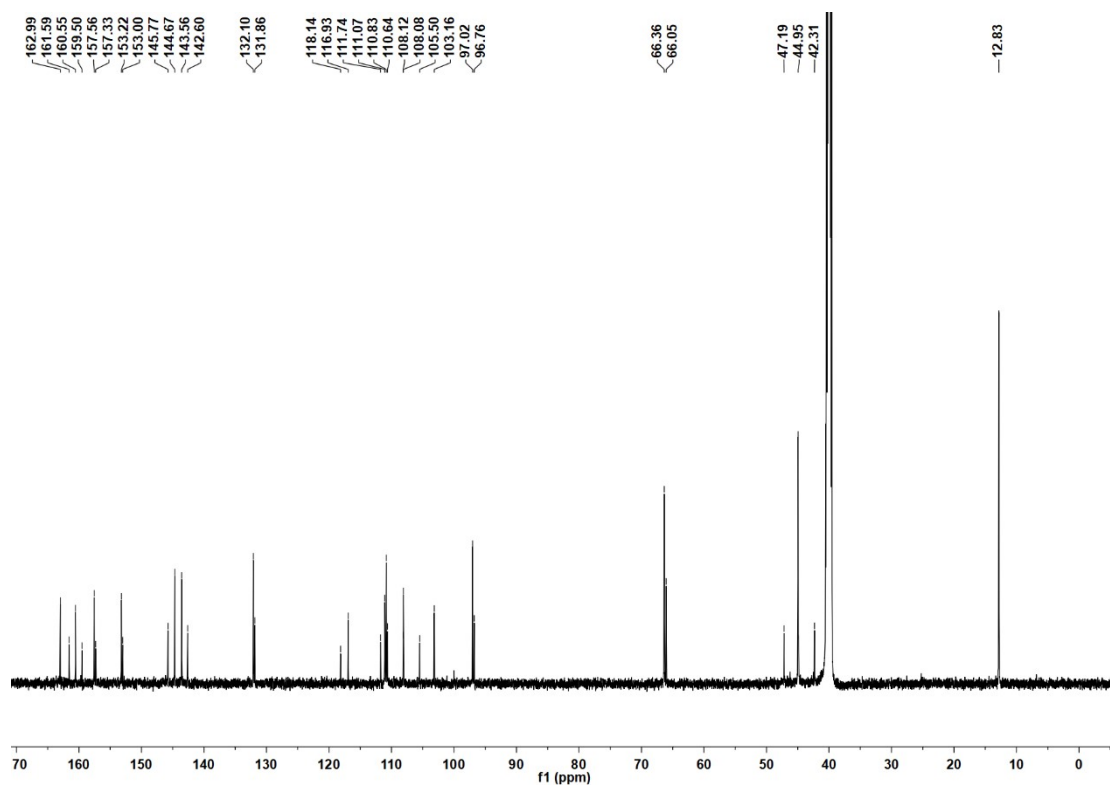

Figure S6. The  $^{13}\text{C}$  NMR (151 MHz) spectra of Compound ECMA in  $\text{DMSO-}d_6$ .

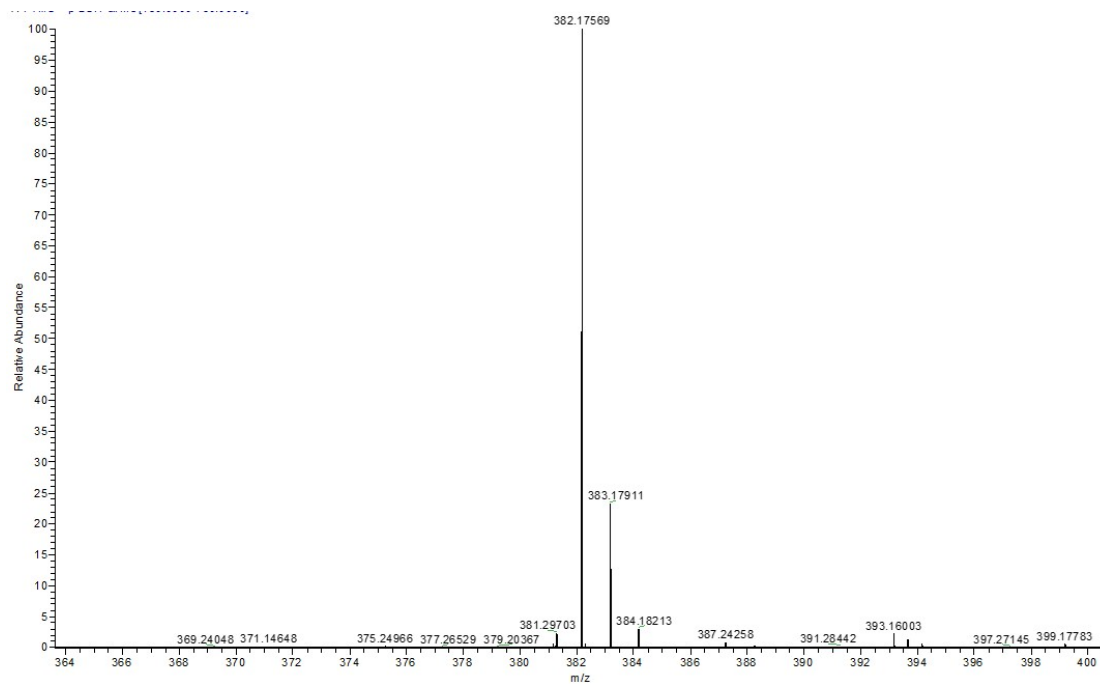

**Figure S7.** HR-MS spectra of Compound ECMA

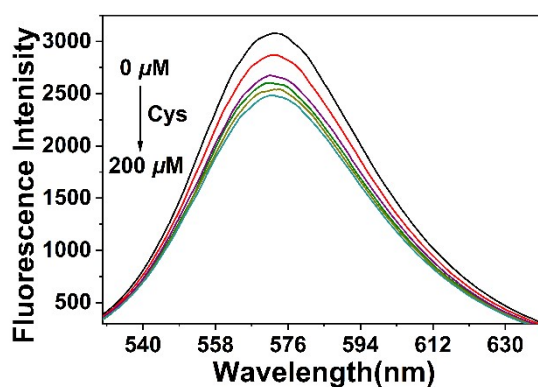

**Figure S8:** Fluorescence emission titration of ECMA in the presence of different concentration of Cys (0-200  $\mu\text{M}$ ) at pH = 5,  $\lambda_{\text{ex}}$  = 475 nm,  $\lambda_{\text{em}}$  = 572 nm. Slit = 5 nm/5 nm.

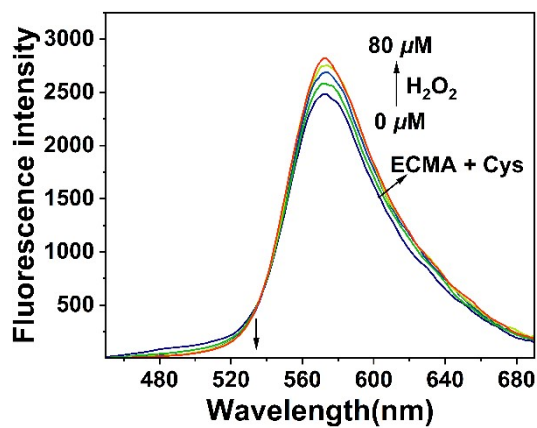

**Figure S9:** Spectral response of ECMA with Cys upon addition of  $\text{H}_2\text{O}_2$  (0-80  $\mu\text{M}$ ) at pH = 5,  $\lambda_{\text{ex}}$  = 475

nm,  $\lambda_{em} = 572$  nm. Slit = 5 nm/5 nm.

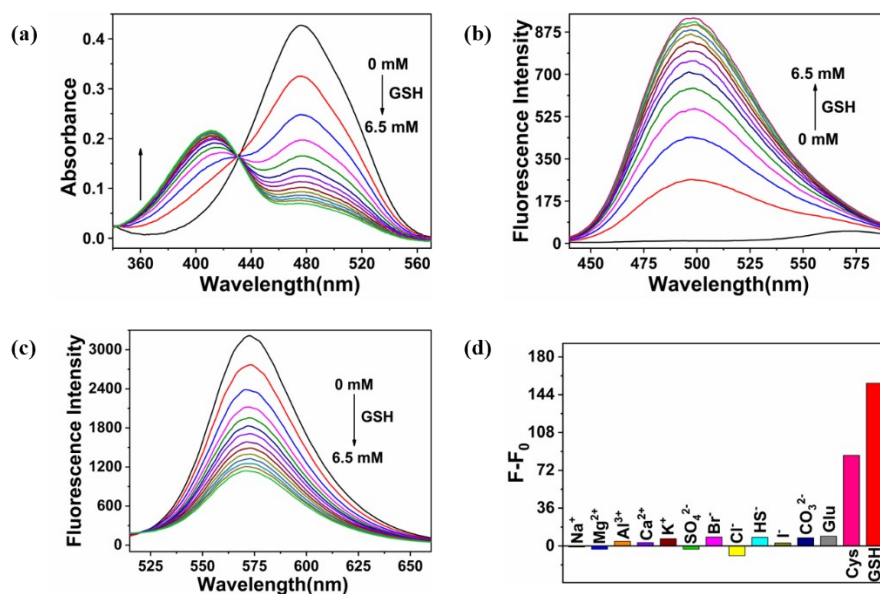

**Figure S10:** Spectral properties of **ECMA** toward **GSH** were investigated in PBS systems. (a) UV-vis absorption spectra of **ECMA** in the presence of different concentration of **GSH** (0-6.5 mM) (b) and (c) Fluorescence titration spectra of **ECMA** upon addition of **GSH** (0-6.5 mM),  $\lambda_{ex} = 475$  nm,  $\lambda_{em} = 575$  nm  $\lambda_{ex} = 400$  nm,  $\lambda_{em} = 500$  nm. (d) The competitive selectivity of **ECMA** (10  $\mu$ M) towards various biologically relevant species (100  $\mu$ M) at 490 nm.

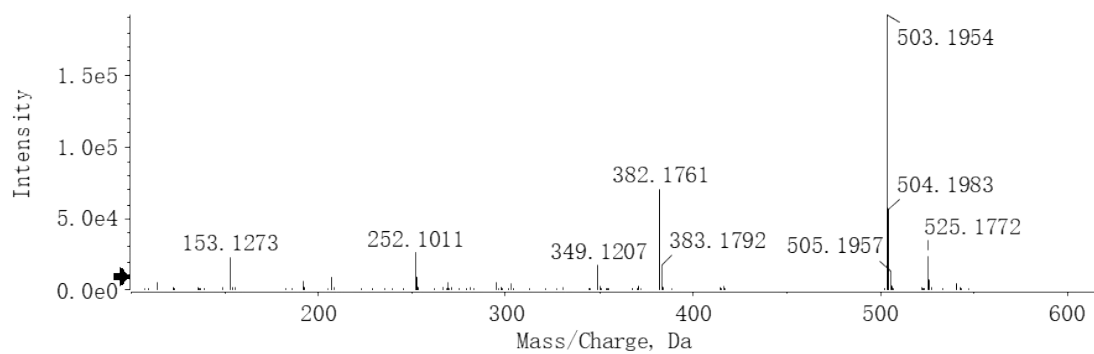

**Figure S11:** The ESI-MS of product obtained by reaction of probe **ECMA** and **Cys**.

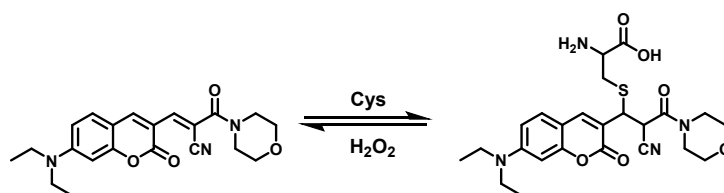

**Figure S12:** The reaction mechanism of **ECMA**.

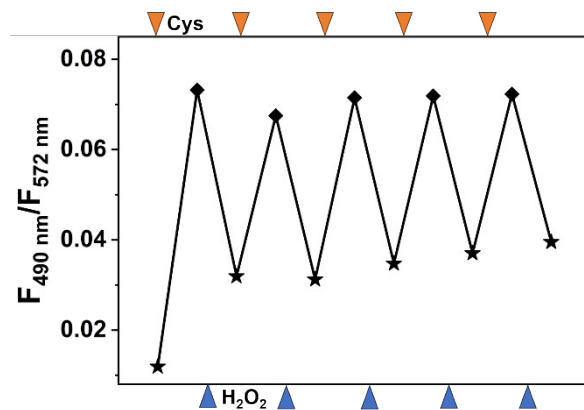

Figure S13: Reversible cyclic response test of ECMA

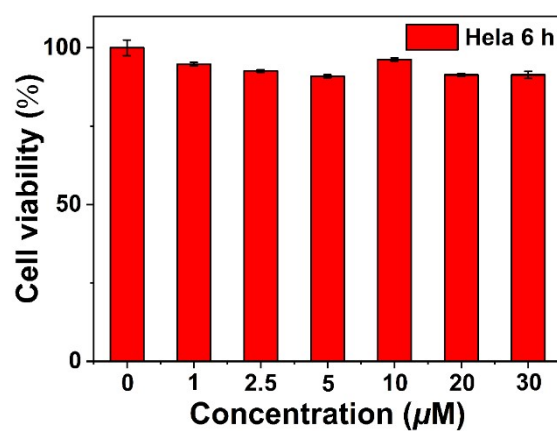

Figure S14: The cytotoxicity test of probe ECMA

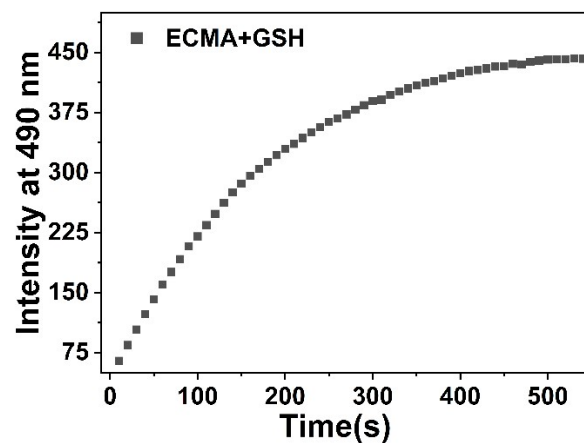

Figure S15: Kinetic test of ECMA (10  $\mu\text{M}$ ) reaction to GSH (1 mM) at PH=7.4.



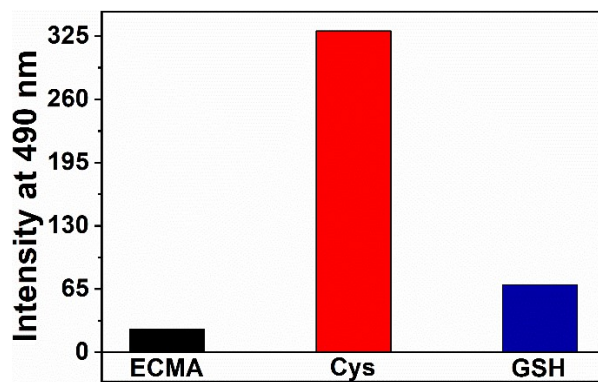

**Figure S16:** The reactivity of ECMA to Cys (200  $\mu$ M) and GSH (6.5 mM) was observed at PH=5.
